# Supplementary material for: First synthesis and characterization of isolable thioselenenic acid, triptycene-9-thioselenenic acidElectronic supplementary information (ESI) available: experimental section. See http://www.rsc.org/suppdata/cc/b2/b207810d/
Source: Royal Society of Chemistry journal article supplement (doi:10.1039/b207810d), 2002-11-05
Supplement: b207810d.doc [file b207810d.doc]

# Electronic Supplementary Information

First Synthesis and Characterization of Isolable Thioselenenic acid, Triptycene-9-thioselenenic Acid

Akihiko Ishii,* Takeshi Takahashi, Akira Tawata, Aki Furukawa, Hideaki Oshida, and Juzo Nakayama*

Department of Chemistry, Faculty of Science, Saitama University,

Saitama, Saitama 338-8570, Japan

ishiiaki@chem.saitama-u.ac.jp

**Acetyl Triptycene-9-thioselenenate (3)**: To a solution of di(9-triptycyl) diselenide (**4**) (93 mg, 0.14 mmol) in dichloromethane (40 mL) was added MCPBA (21 mg, 0.14 mmol) at 0 °C. After stirring for 1 h at 0 °C, thioacetic acid (0.1 mL) was added to the mixture at room temperature. The mixture was stirred for 3 h at room temperature and then diluted with aq. sodium bicarbonate. The organic layer was separated, washed with water, dried, and evaporated to dryness. The residue was subjected to column chromatography (silica gel, hexane-dichloromethane 1:1) to give 104 mg (91%) of **3**: m.p. 177—180 °C (CH2Cl2-Hexane). 1H NMR (CDCl3, 400 MHz) ** 2.50 (s, 3H), 5.37 (s, 1H), 6.98—7.05 (m, 6H), 7.35—7.40 (m, 3H), 7.47—7.51 (m, 3H); 13C NMR (CDCl3, 100.6 MHz) ** 29.8, 54.1, 64.9, 123.5, 123.7, 125.0, 125.9, 144.1, 145.2, 192.1; IR (KBr) 1700 (C=O) cm–1. Anal. Calcd for C22H16OSSe: C, 64.86; H, 3.96. Found: C, 64.80; H, 3.92.

**Triptycene-9-thioselenenic acid (2)**: To a solution of acetyl triptycene-9-thioselenenate (**3**) (117 mg, 0.29 mmol) in EtOH (7 mL) and dichloromethane (4 mL) was added 60% HClO­4­ (2.4 mL). The mixture was heated under reflux for 7 h. The mixture was extracted with dichloromethane, and the organic layer was washed with water and dried. The solvent was removed under reduced pressure, and the residue was recrystallized from hexane-dichloromethane to give 67 mg (63%) of **2** as pale yellow plates, m.p. 170—172 °C decomp (CH2Cl2-hexane). 1H NMR (CDCl3, 400 MHz) ** 2.64 (s, 1H, SH), 5.38 (s, 1H), 7.00—7.08 (m, 6H), 7.36–7.42 (m, 3H), 7.49—7.54 (m, 3H); 13C NMR (CDCl3, 100.6 MHz) ** 54.0, 61.1, 123.6, 123.8, 125.0, 125.7, 144.1, 145.8; IR (KBr) 2520 cm–1. Anal. Calcd for C20H14SSe: C, 65.75; H, 3.86. Found: C, 65.73; H, 3.89

Crystal data for **2**: C20H14SSe, *M*w 365.36, pale yellow plate, 0.24  0.16  0.08 mm3, triclinic, space group *P*–1, *a* = 8.181(2), *b* = 8.217(1), *c* = 13.175(3) Å, ** = 82.53(1), ** = 72.58(1), ** = 67.82(1)°, *V* = 782.4(2)) Å3, *Z* = 2, **calcd = 1.551 g cm–1, **(CuK) = 4.42 mm–1. Mac Science MXC3KHF diffractometer with graphite-monochromated CuKradiation (** = 1.54178 Å), ** /2** scans method in the range 3° < 2** < 140° (­–9 ≤ *h* ≤ 9, 0 ≤ *k* ≤ 10, –15 ≤ *l* ≤ 16), 2994 independent reflections. The structure was solved with direct methods (SIR921), and refined with full-matrix least-squares (SHELXL-972) using all independent reflections for 256 parameters. Absorption correction was done by a psi-scan method. The non-hydrogen atoms were refined anisotropically: *R*1 = 0.0303 (*I* > 2(*I*), 2822 reflections), *wR*2 = 0.0860 (for all), GOF = 1.05; max/min residual density = 0.454/–0.452 e Å–3.

**Treatment of Triptycene-9-thioselenenic acid (2) with triethylamine**

(a) To a solution of **2** (3.6 mg, 0.0099 mmol) in benzene (1 mL) *under argon* was added a benzene solution of triethylamine (0.01 M, 1 mL, 0.01 mmol) dropwise in a period of 5 min at room temperature. The mixture was diluted with aq. NH4Cl and benzene. The organic layer was separated, washed with water, dried, and evaporated to dryness. The 1H NMR spectrum of the residue showed that the mixture consisted of **2**, triptycene-9-selenol (**5**), di(triptycene-9-selenenyl) sulfide (**6**), and an unidentifiable compound (the bridgehead proton appeared at ** 5.41) in the ratio of 56 : 31 : 4 : 9. The reaction carried out *under air* provided a similar result.

(b) To a solution of **2** (4.5 mg, 0.012 mmol) in benzene (1 mL) was added a benzene solution of triethylamine (0.01 M, 1.25 mL, 0.0125 mmol) dropwise in a period of 5 min at room temperature. The mixture was evaporated to dryness. The 1H NMR spectrum of the residue showed the formation of diselenenyl sulfide **6**, diselenide **4**, **2**, and an unidentifiable compound (the bridgehead proton appeared at ** 5.41) in the ratio of 50 : 23 : 11 : 16.

An authentic sample of **6** was prepared as follows. To a solution of **2** (44 mg, 0.117 mmol) in dichloromethane (7 mL) was added triethylamine (12 mg, 0.12 mmol) at room temperature under air. The mixture was stirred for 2 h and then evaporated to dryness to give mostly pure **6**. The crude **6** was recrystallized from hexane-dichloromethane to give 27 mg (66%) of **6** as pale yellow crystals: m.p. 345—346 °C decomp (hexane-CH2Cl2). 1H NMR (CDCl3, 300 MHz) ** 5.46 (s, 2H), 7.11 (pseudo d of quintet, *J* = 1.5, 7.4 Hz, 12H), 7.46 (dd, *J* = 1.5, 7 Hz, 6H), 7.76 (dd, *J* = 1.5, 8 Hz, 6H); 13C NMR (CDCl3, 100.6 MHz) ** 54.2, 65.2, 123.7, 124.4, 125.1, 125.9, 144.7, 145.6. Anal. Calcd for C40H22SSe2: C, 68.96; H, 3.76. Found: C, 68.31; H, 3.68.

Reaction of Triptycene-9-thioselenenic Acid (2) with Triphenyltin Chloride in the Presence of Triethylamine

To a solution of triphenyltin chloride (35.7 mg, 0.093 mmol) and triethylamine (2.5 mg, 0.025 mmol) in benzene (7.5 mL) was added a solution of **2** (9.2 mg, 0.025 mmol) in benzene (15 mL) dropwise for a period of 1 h at room temperature. The mixture was diluted with aq. NH4Cl. The organic layer was separated, washed with water, dried, and evaporated to dryness. The 1H NMR spectrum of the residue showed the formation of triphenylstannyl triptycene-9-thioselenenate (**7**), triphenylstannyl 9-triptycyl selenide (**8**), and an unidentifiable compound (its bridgehead proton appeared at ** 5.33) in the ratio of 82 : 16 : 2.

An analytical sample of **7** was obtained by rough separation with gel permeation chromatography (GPC, CHCl3) followed by recrystallization from hexane-ether.

An authentic sample of **8** was prepared by reaction of triptycene-9-selenol (**5**) (52 mg, 0.15 mmol) with triphenyltin chloride (176 mg, 0.46 mmol) in a mixed solvent of ether (40 mL) and benzene (10 mL) in the presence of triethylamine (15 mg, 0.15 mmol) (72% yield).

**Triphenylstannyl Triptycene-9-thioselenenate (7)**: yellow crystals, m.p. 176—178 °C decomp (Et2O-hexane). 1H NMR (CDCl3, 200 MHz) ** 5.29 (s, 1H), 6.74 (dt, *J* = 1, 8 Hz, 3H), 6.93 (dt, *J* = 1, 7 Hz, 3H), 7.30 (dd, *J* = 1, 7 Hz, 3H), 7.43—7.55 (m, 12H), 7.74—7.84 (m, 6H, accompanying satellite signals, *J* = 55 Hz, due to 117Sn and 119Sn); 13C NMR (CDCl3, 75.5 MHz) ** 54.0, 61.7, 123.1, 124.6, 124.8, 125.4, 129.1, 130.2, 137.0, 137.1, 144.4, 145.4. Anal. Calcd for C38H28SSeSn: C, 68.39; H, 3.95. Found: C, 63.71; H, 3.90.

Crystal data for **7**: C38H28SSeSn, *M*w 714.356, yellow crystals, 0.26  0.26  0.12 mm3, orthorhombic, space group *P*212121, *a* = 11.4730(4), *b* = 15.4100(6), *c* = 17.6340(6) Å, *V* = 3117.7(2) Å3, *Z* = 4, **calcd = 1.522 g cm–3, **(MoK) = 2.079 mm–1. Mac Science DIP3000 diffractometer with a graphite-monochromated Mo-Ka radiation (** = 0.71073 Å), solved with direct methods (SIR921), and refined with full-matrix least-squares (SHELXL-972) using all independent reflections (6631 reflections). Absorption corrections were done by a multi-scan method (SORTAV3). Hydrogen atoms were placed at calculated positions, 370 parameters; *R*1 = 0.0492 (*I* > 2(*I*), 4849 reflections), *wR*2 = 0.1027 (for all), GOF = 1.038; max/min residual density = 0.435/–0.687 e Å–3.

**Triphenylstannyl 9-Triptycyl Selenide (8)**: colorless cubes, m.p. 253—255 °C (hexane-CH2Cl2). 1H NMR (CDCl3, 400 MHz) ** 5.28 (s, 1H), 6.64 (dt, *J* = 1, 8 Hz, 3H), 6.87 (dt, *J* = 1, 8 Hz, 3H), 7.20—7.34 (m, 12H), 7.40 (dd, *J* = 1, 8 Hz, 6H, accompanying satellite signals, *J* = 55 Hz, due to 117Sn and 119Sn), 7.79 (d, *J* = 7.5 Hz, 3H); 13C NMR (CDCl3, 100.6 MHz) ** 54.1, 61.7, 122.6, 124.5, 125.36, 125.41, 128.6, 129.4, 136.8, 138.2, 144.8, 146.4. Anal. Calcd for C38H28SeSn: C, 66.89; H, 4.14. Found: C, 66.65; H, 4.04.

Crystal data for **8**: C38H28SeSn, *M*w 682.292, colorless cubes, 0.18  0.12  0.10 mm3, monoclinic, space group *P*21/*c*, *a* = 9.3690(4), *b* = 24.7190(10), *c* = 13.5380(5) Å, ** = 105.092(3)°, *V* =3027.2(2) Å3, *Z* = 4, **calcd = 1.497 g cm–3, **(MoK) = 2.07 mm–1. Mac Science DIP3000 diffractometer with a graphite-monochromated Mo-K radiation (** = 0.71073 Å), solved with direct methods (SIR921), and refined with full-matrix least-squares (SHELXL-972) using all independent reflections (5927 reflections). Absorption corrections were done by a multi-scan method (SORTAV3). 473 parameters; *R*1 = 0.0383 (*I* > 2(*I*), 3957 reflections), *wR*2 = 0.0801 (for all), GOF = 0.936; max/min residual density = 0.287/–0.546 e Å–3.

**References**

1. Altomare, A.; Cascarano, G; Giacovazzo, C.; Guagliardi, A. *J. Appl. Crystallogr.* **1993**, *26*, 343-350.
2. Sheldrick, G. M. SHELXL-97, Program for Crystal Structure Refinement, Göttingen University, Germany, 1997.
3. Blessing, R. H. *Acta. Cryst.* **1995**, *A51*, 33-38.
